# Supplementary material
Source: MDPI journal article supplement (https://www.mdpi.com/search?q=surfaces-02-00001)
Supplement: s001 [file surfaces-02-00001-s001.pdf]

## Supplementary information

### Electrochemical Behavior of Pt-Ru Catalysts Supported on Graphitised Ordered Mesoporous Carbons Toward the CO and Methanol Oxidation

J. C. Calderón<sup>1</sup>, V. Celorrio<sup>2,3</sup>, L. Calvillo<sup>4</sup>, D. Sebastián<sup>1</sup>, R. Moliner<sup>1</sup>, and M.J. Lázaro<sup>1,\*</sup>

<sup>1</sup>Instituto de Carboquímica (CSIC), Miguel Luesma Castán 4, 50018 Zaragoza

<sup>2</sup>UK Catalysis Hub, Research Complex at Harwell, RAL, Oxford, OX11 0FA, UK.

<sup>3</sup>Kathleen Lonsdale Building, Department of Chemistry, University College London, Gordon Street, London, WC1H 0AJ, UK

<sup>4</sup>Dipartimento di Scienze Chimiche, Università di Padova, Via Marzolo 1, 35131 Padova, Italy

\*Correspondence: mlazaro@icb.csic.es; Tel.: +34-976-733-977

The XPS spectra and their deconvolution for the catalysts supported on gCMK-3 are presented in this Supplementary Information. Figure S1 shows the XPS spectra of Pt 4f for Pt/gCMK-3 catalysts. As described in the manuscript, three pairs of Pt peaks were observed, which correspond to the three-oxidation states of this metal.

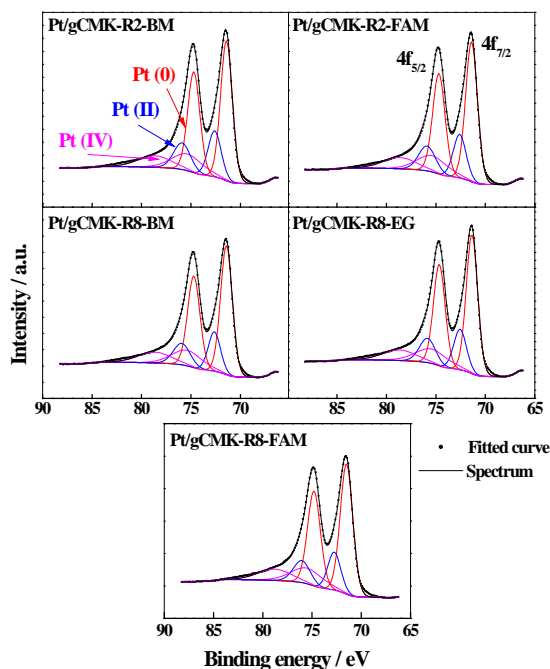

Figure S1. Pt 4f XPS spectra for the synthesised Pt/gCMK-3 catalysts. Red line: Pt (0). Blue line: Pt (II). Pink line: Pt (IV).

Figure S2 shows the XPS spectra of Pt 4f for Pt-Ru/gCMK-3 catalysts, displaying the same pairs of Pt peaks observed in the Figure S1.

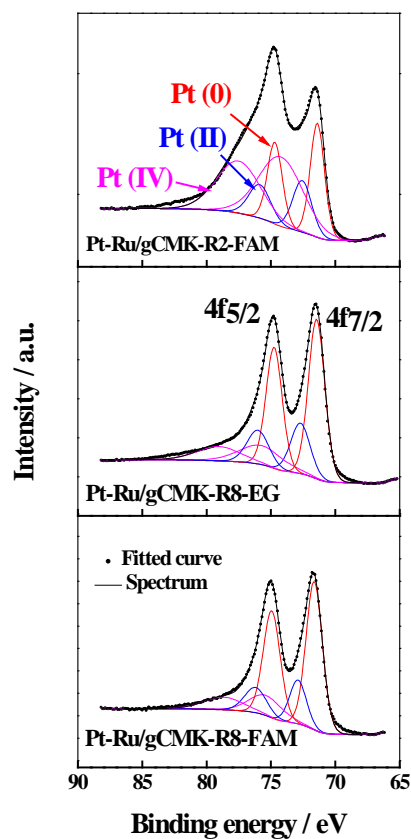

Figure S2. Pt 4f XPS spectra for the synthesised Pt-Ru/gCMK-3 catalysts. Red line: Pt (0). Blue line: Pt (II). Pink line: Pt (IV).

Figure S3 depicts the XPS spectra of Ru 3p for Pt-Ru/gCMK-3 catalysts. Three pairs of Ru peaks corresponding to Ru (0), Ru (IV) and Ru (IV) hydrated were observed in these spectra.

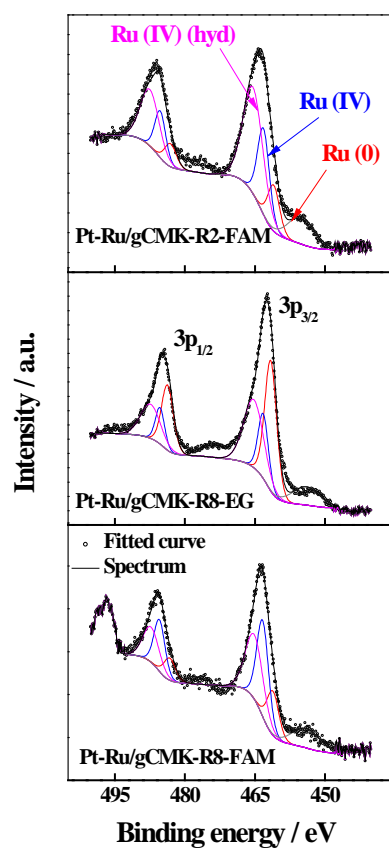

Figure S3. Ru 3p XPS spectra for the synthesised Pt-Ru/gCMK-3 catalysts. Red line: Ru (0). Blue line: Ru (IV). Pink line: Ru (IV) hydrated.
